# Supplementary material
Source: PubMed Central journal article supplement (PMC2154477)

**a**

**anomalous-image trials**  
(12% of trials)

**percent trials**  
(group average  
+/- standard error  
across subjects)

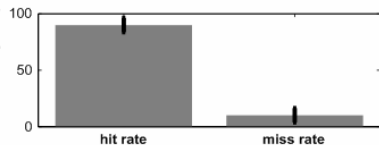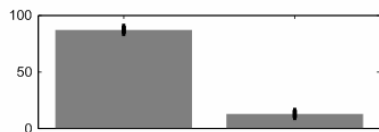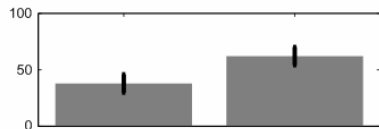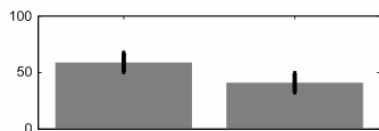

**standard-image trials**  
(88% of trials)

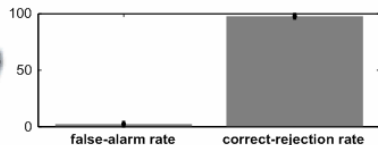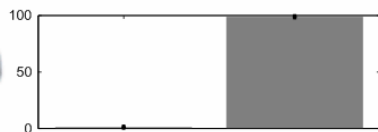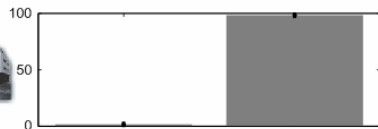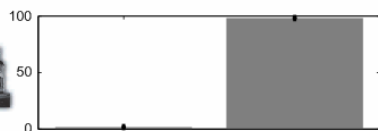**b**

**anomalous-image trials**  
(12% of trials)

**reaction time [ms]**  
(group average +/- standard error  
across subjects)

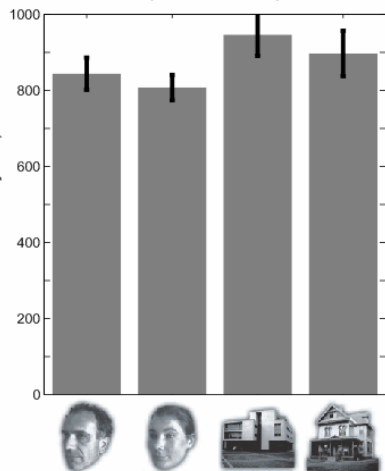

**standard-image trials**  
(88% of trials)

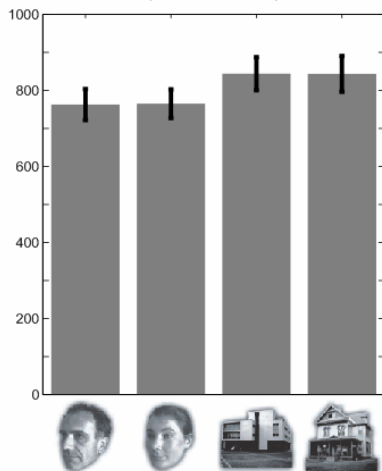

Supplement: supp_0705654104_05654Fig5.pdf [file supp_0705654104_05654Fig5.pdf]
