# Supplementary material
Source: PubMed Central journal article supplement (PMC2154477)

# a Analysis of response-pattern information for a region of interest

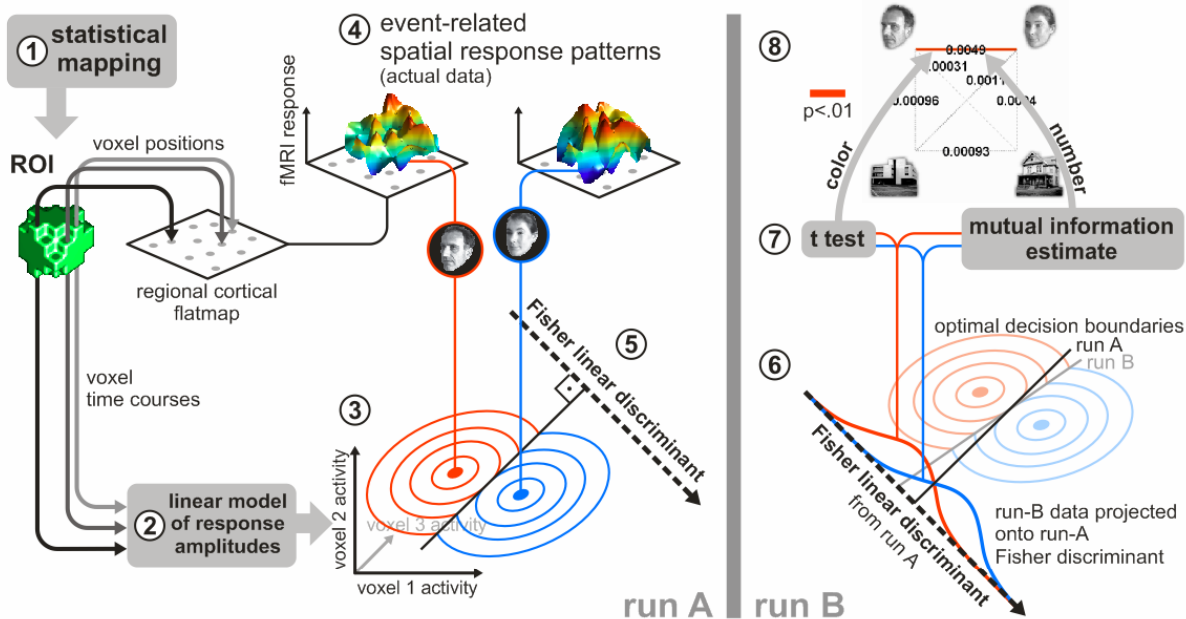

# b Finding informative regions with a multivariate searchlight

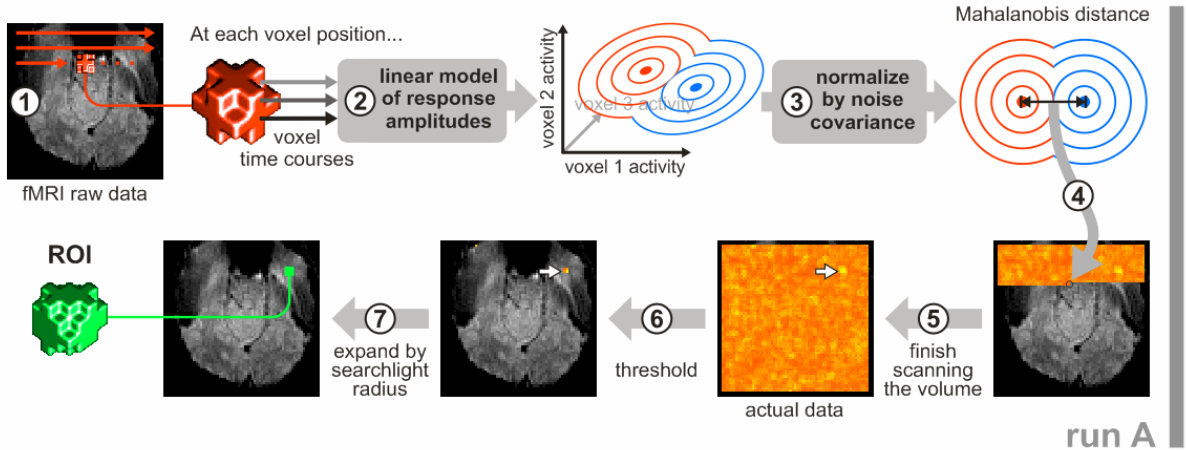

Supplement: supp_0705654104_05654Fig8.pdf [file supp_0705654104_05654Fig8.pdf]
