# Supplementary material
Source: PubMed Central journal article supplement (PMC2154477)

FFA

left

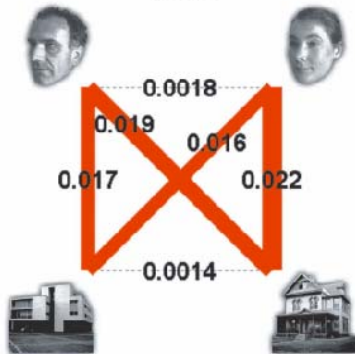

right

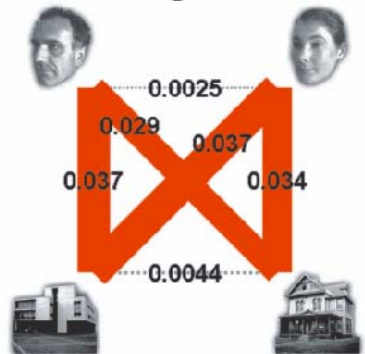

PPA

left

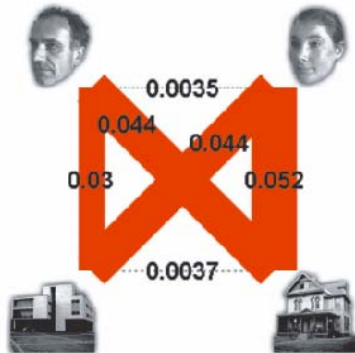

right

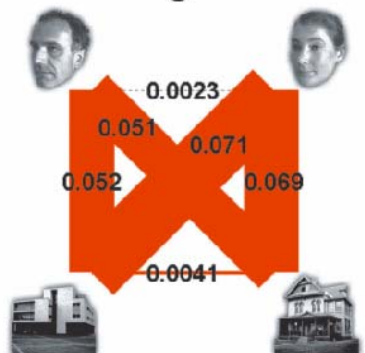

early visual cortex

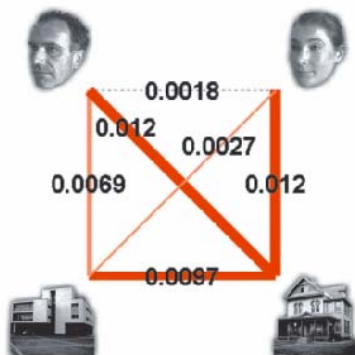

aIT face-exemplar region

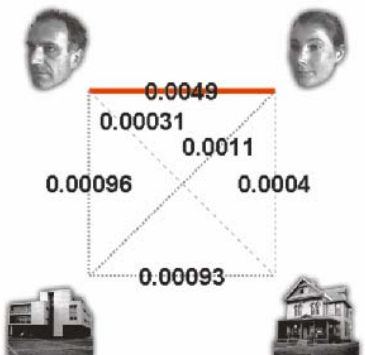

p < 1% ———  
 p < 5% ———

Supplement: supp_0705654104_05654Fig10.pdf [file supp_0705654104_05654Fig10.pdf]

**a**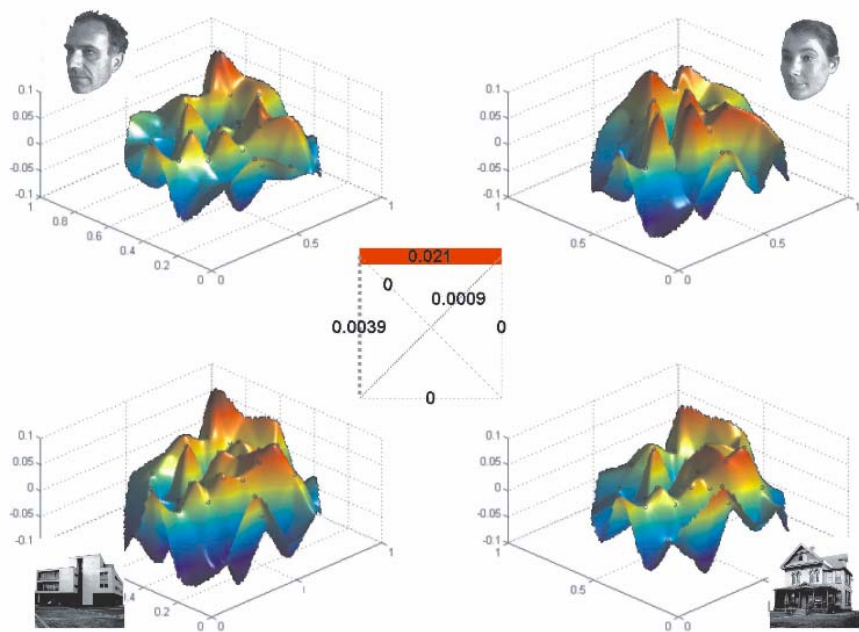**b**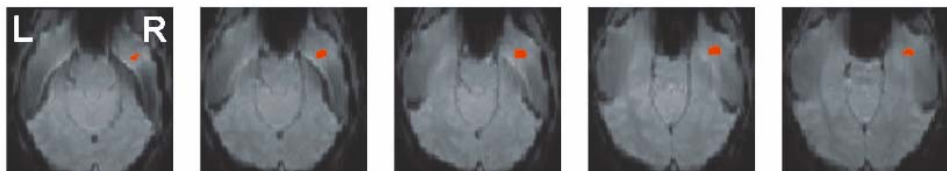

Supplement: supp_0705654104_05654Fig11.pdf [file supp_0705654104_05654Fig11.pdf]

**anomalous-image trials (12% of trials)**

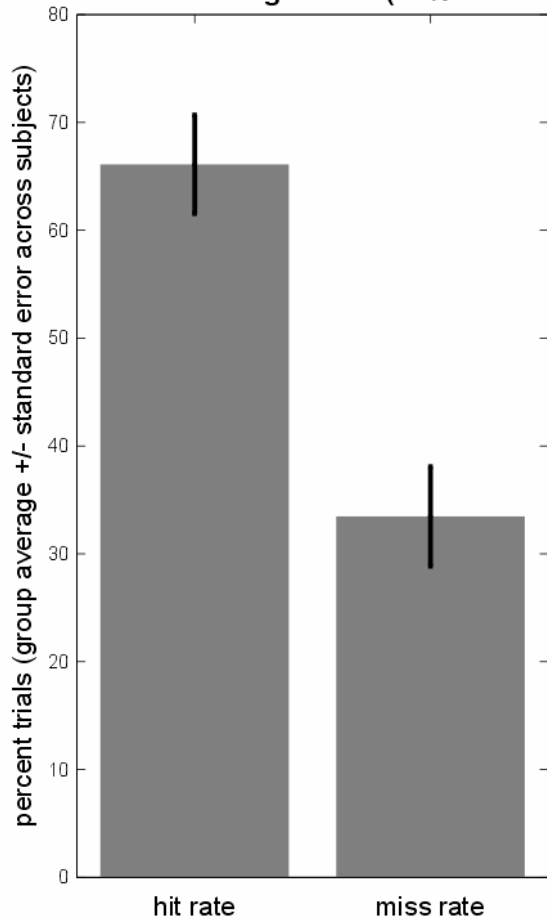

**standard-image trials (88% of trials)**

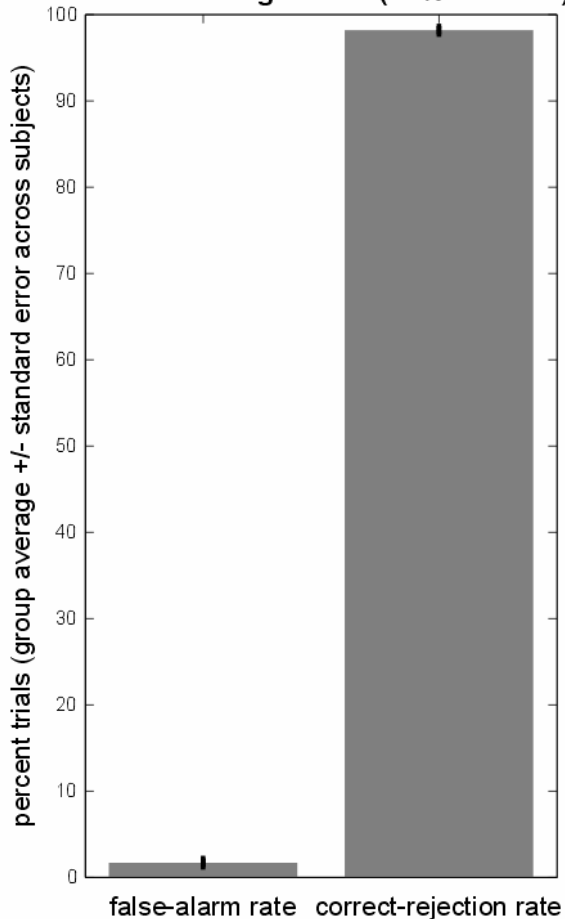

Supplement: supp_0705654104_05654Fig4.pdf [file supp_0705654104_05654Fig4.pdf]

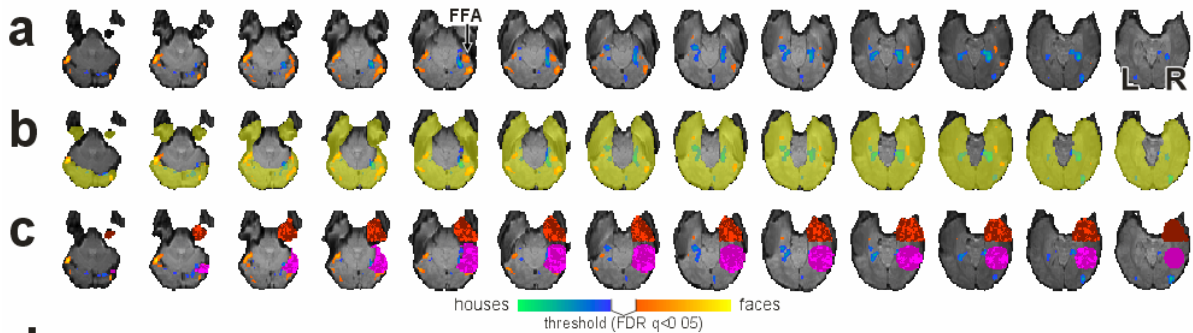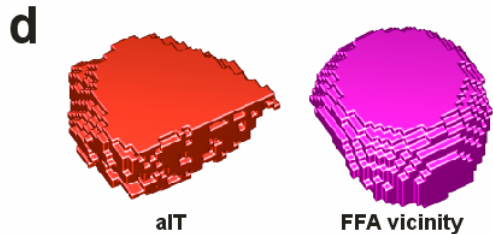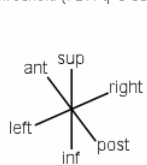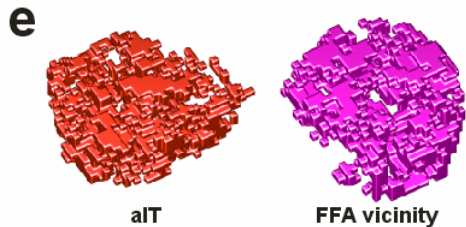

Supplement: supp_0705654104_05654Fig6.pdf [file supp_0705654104_05654Fig6.pdf]

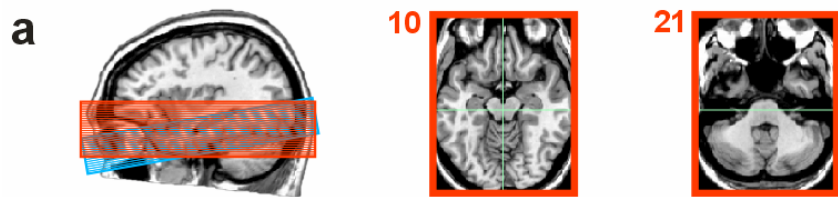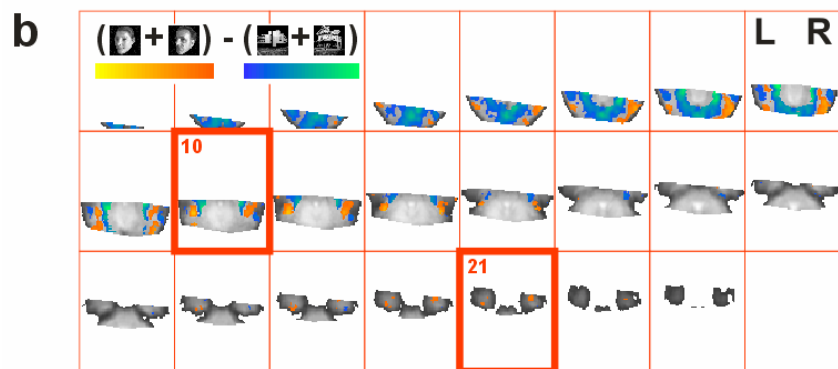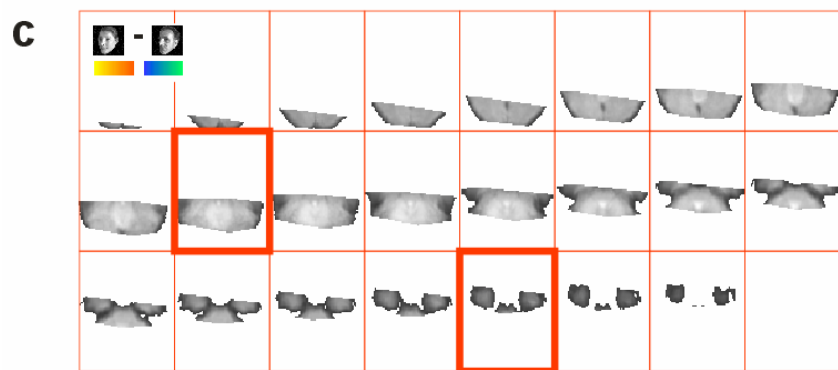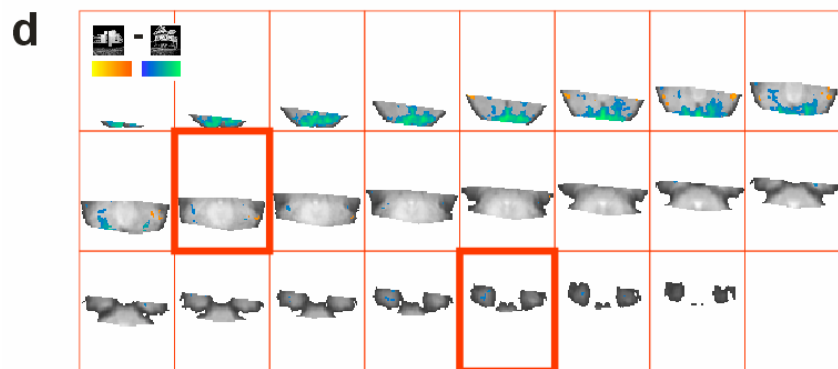

Supplement: supp_0705654104_05654Fig7.pdf [file supp_0705654104_05654Fig7.pdf]

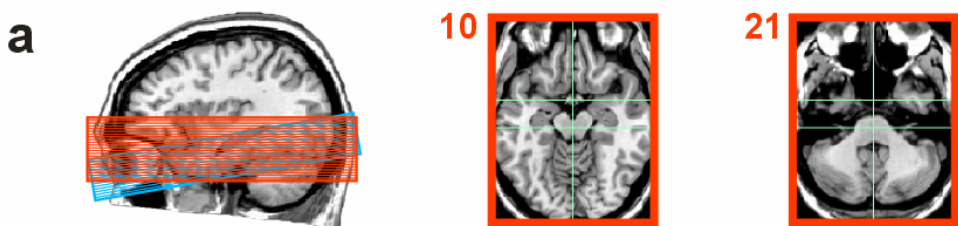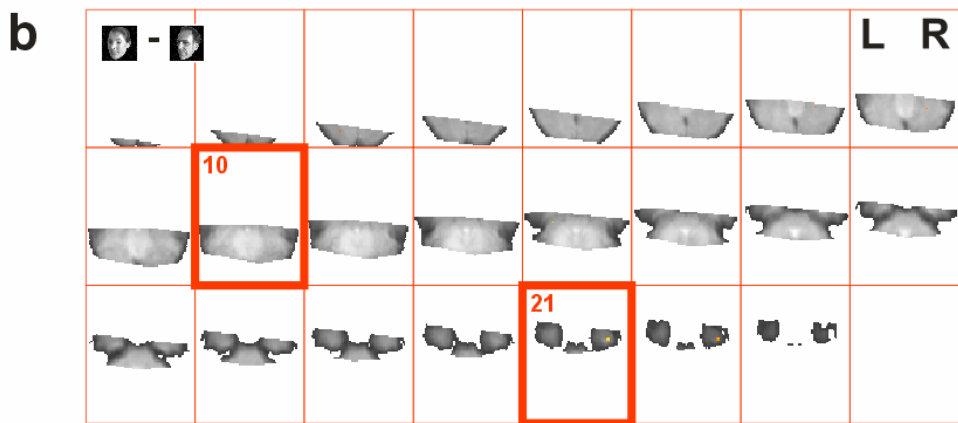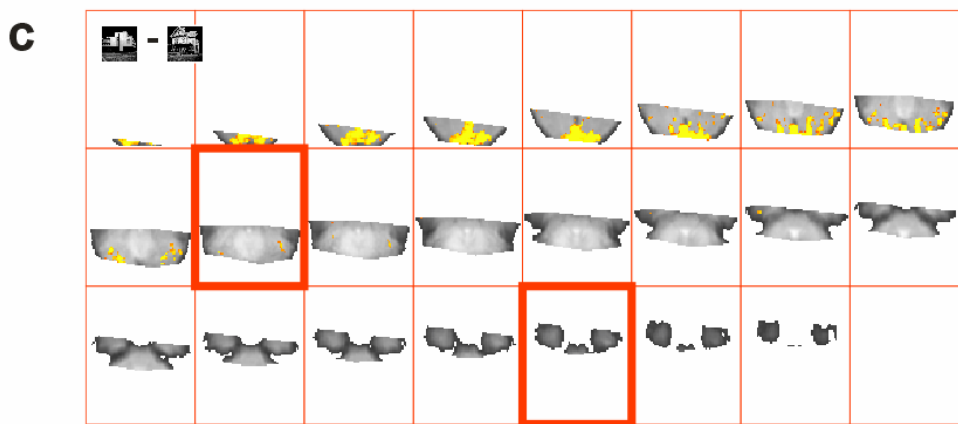

Supplement: supp_0705654104_05654Fig9.pdf [file supp_0705654104_05654Fig9.pdf]
